# Supplementary material
Source: PubMed Central journal article supplement (PMC4764150)
Supplement: supp_db15-0849_DB150849SupplementaryData.pdf [file supp_db15-0849_DB150849SupplementaryData.pdf]

SUPPLEMENTARY DATA

**Supplementary Figure S1.** Flow chart for sample selection.

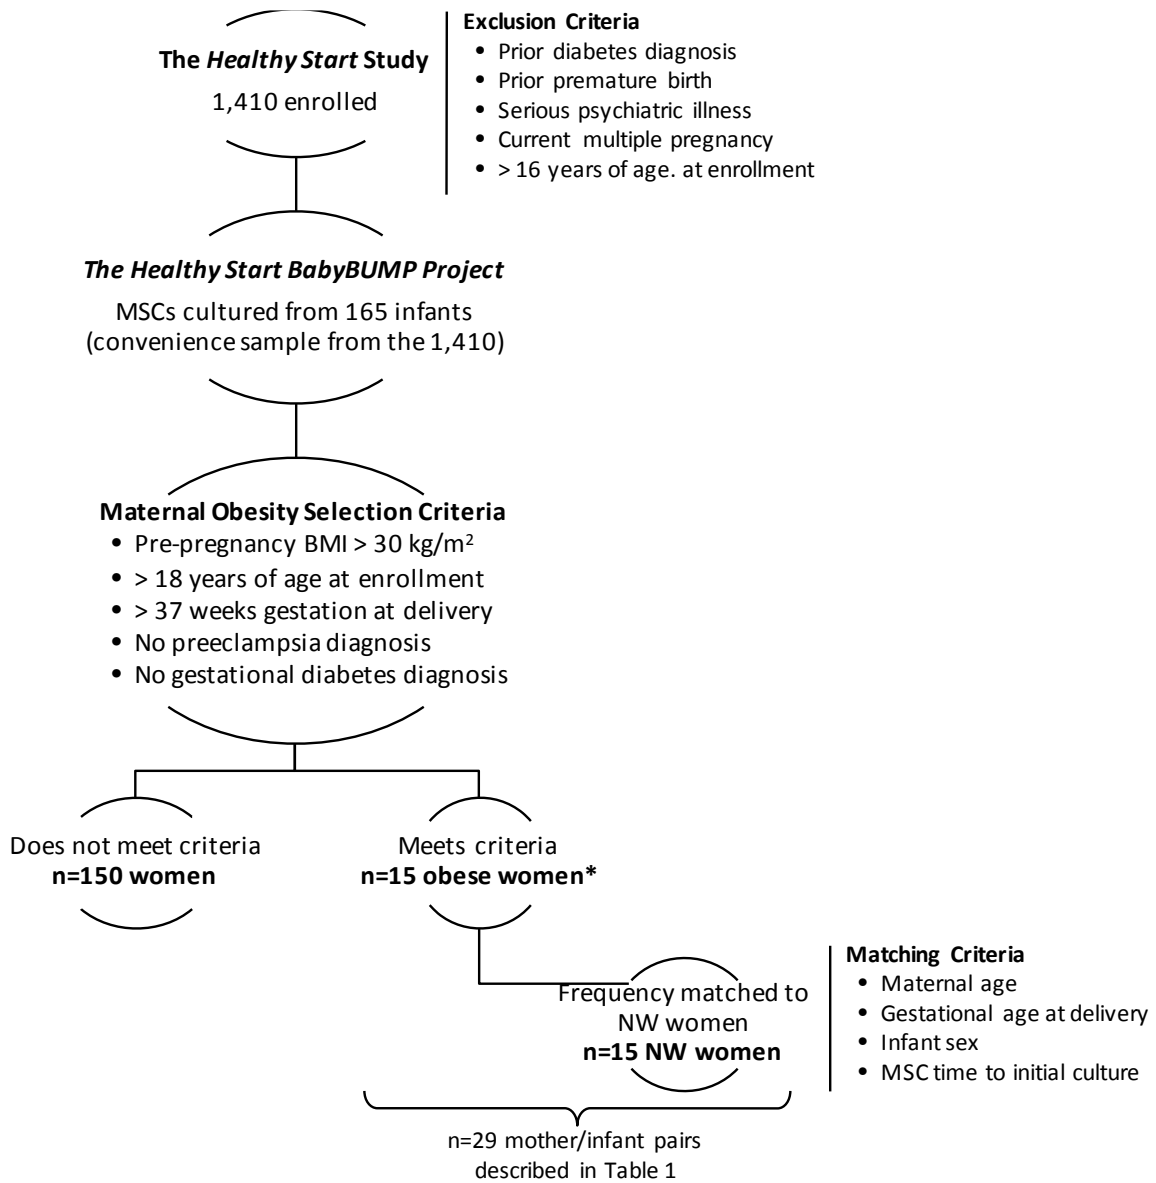

\* During data analysis one obese woman was identified as having developed gestational diabetes and was excluded.

SUPPLEMENTARY DATA

**Supplementary Figure S2.** For flow cytometry experiments, the gating tree was set as follows: *A*) light scatter gate (side scatter area/forward scatter area), *B*) live/dead gate (DAPI negative cells), *C*) singlet gate (forward scatter height/forward scatter area).

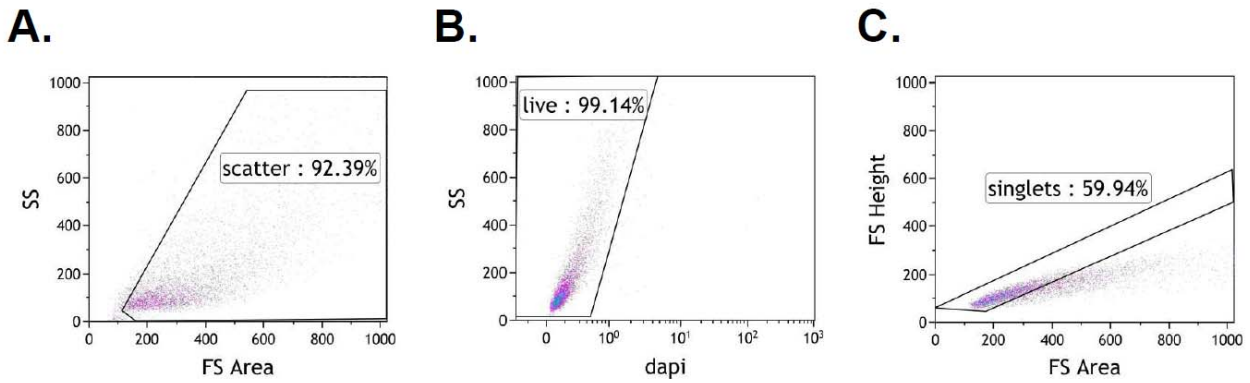

**Supplementary Figure S3.** ORO content of the 21 day adipogenic differentiating cells is positively correlated with infant % fat mass at birth when controlling for infant sex and maternal BMI ( $r=0.475$ ,  $P=0.026$ ; Table 2)

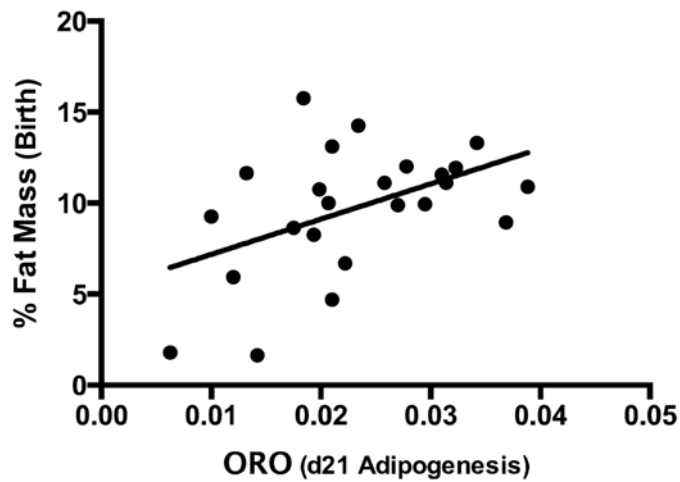

SUPPLEMENTARY DATA

**Supplementary Table S1.** Flow Cytometry Antibody List

| Antibody | Fluorochrome    | Vendor, Cat. No., Clone         |
|----------|-----------------|---------------------------------|
| CD73     | APC             | BD Pharmingen, #560847, AD2     |
| CD90     | FITC            | BD Pharmingen, #555595, 5E10    |
| CD105    | FITC            | BD Pharmingen, #555821, 581     |
| CD34     | PE              | BD Pharmingen, #550761, 563     |
| CD45     | APC-Cy7         | BD Pharmingen, #557833, 2D1     |
| CD19     | FITC            | BD Pharmingen, #555412, HIB19   |
| CD13     | APC             | BD Pharmingen, #557454, WM15    |
| Myogenin | Alexa Fluor 488 | R&D Systems, #IC6686G, 671038   |
| BODIPY   | 493/503         | Life Technologies, #D-3922, N/A |

**Supplementary Table S2.** Flow Cytometer Set-up

| <b>Instrument:</b> Beckman Coulter Gallios |                 |        |        |        |         |        |
|--------------------------------------------|-----------------|--------|--------|--------|---------|--------|
| <b>Laser Lines</b>                         | 488 nm          |        |        | 633 nm |         | 405 nm |
| <b>Emission Filters</b>                    | 525/40          | 582/15 | 755LP  | 660/30 | 755LP   | 450/50 |
| <b>Fluorochrome</b>                        | FITC            | PE     | PE-Cy7 | APC    | APC-Cy7 | DAPI   |
|                                            | Alexa Fluor 488 |        |        |        |         |        |
|                                            | BODIPY 493/503  |        |        |        |         |        |

**Supplementary Table S3.** qPCR Primer Sequences

| Gene   | NCBI Gene ID | Forward                  | Reverse                   |
|--------|--------------|--------------------------|---------------------------|
| POU5F1 | 5460         | CGAGCAATTTGCCAAGCTCCTGAA | GCCGCAGCTTACACATGTTCTTGA  |
| NANOG  | 79923        | TATGCCTGTGATTTGTGGGCCTGA | CTGCAGAAGTGGGTTGTTGCCTT   |
| MYH2   | 4620         | TGAAGCTGTCAAGGGTCTACGCAA | TTCCTCCGCTTCTTCAGCTTGTCT  |
| RPL13A | 23521        | CCTGGAGGAGAAGAGAAAGAGA   | TTGAGGACCTCTGTGTATTTGTCAA |
| UBC    | 7316         | ATTTGGGTCGCGGTTCTTG      | TGCCTTGACATTCTCGATGGT     |

SUPPLEMENTARY DATA

**Supplementary Table S4.** WES Antibody and Assay Conditions

| <b>Antibody</b>                  | <b>Manufacturer</b>       | <b>Cat. No.</b> | <b>Ab Dilution</b> | <b>Sample [protein]<br/>(<math>\mu\text{g}/\mu\text{L}</math>)</b> |
|----------------------------------|---------------------------|-----------------|--------------------|--------------------------------------------------------------------|
| AMPK (p thr172)                  | Cell Signaling Technology | 2535            | 1:50               | 0.2                                                                |
| Akt (p ser473)                   | Cell Signaling Technology | 9275            | 1:50               | 0.4                                                                |
| $\beta$ -Actin                   | Cell Signaling Technology | 4970            | 1:50               | 0.2                                                                |
| $\beta$ -catenin (total)         | Cell Signaling Technology | 9582            | 1:50               | 0.05                                                               |
| $\beta$ -catenin (p ser552)      | Cell Signaling Technology | 9566            | 1:25               | 0.4                                                                |
| $\beta$ -catenin (p thr41/ser45) | Cell Signaling Technology | 9565            | 1:50               | 0.2                                                                |
| C/EBP $\beta$                    | Novus Biologicals         | NB110-55642     | 1:25               | 0.4                                                                |
| GSK-3 $\beta$ (total)            | Novus Biologicals         | NBP1-47470      | 1:50               | 0.2                                                                |
| GSK-3 $\beta$ (p ser9)           | Cell Signaling Technology | 9323            | 1:50               | 0.4                                                                |
| MHC                              | R&D Systems               | MAB4470         | 1:25               | 0.4                                                                |
| Myogenin                         | R&D Systems               | MAB66861        | 1:25               | 0.4                                                                |
| FABP4                            | Novus Biologicals         | NBP1-89218      | 1:20               | 0.4                                                                |
| PPAR $\gamma$                    | Cell Signaling Technology | 2435            | 1:25               | 0.8<br>(0.4 for nuclear ext.)                                      |
| STAT3 (p tyr705)                 | Cell Signaling Technology | 9138            | 1:50               | 0.4                                                                |
